# Supplementary material
Source: PubMed Central journal article supplement (PMC9397175)
Supplement: 41581_2022_617_MOESM1_ESM.pdf [file 41581_2022_617_MOESM1_ESM.pdf]

**Supplementary information**

---

**Vaccination in patients with kidney failure:  
lessons from COVID-19**

---

In the format provided by the  
authors and unedited

**Supplementary Table 1. Immune response of patients receiving dialysis and kidney transplant recipients after a COVID-19 prime—boost vaccination course**

| Study                        | Kidney replacement therapy | Vaccine                             | Time after last vaccination (weeks) | Sample (N) | Binding humoral response (%) | Neutral. humoral response (%) | T cell response (% of all) |
|------------------------------|----------------------------|-------------------------------------|-------------------------------------|------------|------------------------------|-------------------------------|----------------------------|
| Agur <sup>1</sup>            | HD                         | BNT162b2                            | 2-6                                 | 122        | 93.4                         | NA                            | NA                         |
|                              | PD                         |                                     |                                     | 23         | 95.7                         | NA                            | NA                         |
| Anand <sup>2</sup>           | HD                         | BNT162b2, mRNA-1273 and Ad26.COV2.S | 2                                   | 519        | 92.1                         | NA                            | NA                         |
| Attias <sup>3</sup>          | HD                         | BNT162b2                            | 6-7                                 | 64         | 85.9                         | NA                            | NA                         |
| Bachelet <sup>4</sup>        | HD                         | BNT162b2                            | 4                                   | 193        | 94.3                         | NA                            | NA                         |
| Bassi <sup>5</sup>           | HD                         | BNT162b2 and mRNA-1273              | 2-3                                 | 130        | 94.4                         | 51.0                          | NA                         |
|                              | PD                         |                                     |                                     | 13         |                              |                               | NA                         |
| Benotman e <sup>6</sup>      | Tx                         | mRNA-1273                           | 4                                   | 205        | 47.8                         | NA                            | NA                         |
| Berar Yanay <sup>7</sup>     | HD                         | BNT162b2                            | Up to 10                            | 127        | 90.0                         | NA                            | NA                         |
|                              | PD                         |                                     |                                     | 33         |                              |                               | NA                         |
| Bertrand <sup>8</sup>        | HD                         | BNT162b2                            | 4                                   | 9          | 88.9                         | NA                            | 100.0 <sup>a</sup>         |
|                              | Tx                         |                                     |                                     | 45         | 17.8                         | NA                            | 57.8 <sup>a</sup>          |
| Bertrand <sup>9</sup>        | HD                         | BNT162b2                            | 3-9                                 | 62         | 91.9                         | NA                            | NA                         |
|                              | Tx                         |                                     |                                     | 235        | 27.7                         | NA                            | NA                         |
| Billany <sup>10</sup>        | HD                         | AZD1222 and BNT162b2                | 4                                   | 94         | 79.8                         | NA                            | NA                         |
| Boyarsky <sup>11</sup>       | Tx                         | BNT162b2 and mRNA-1273              | 4                                   | 322        | 47.8                         | NA                            | NA                         |
| Broseta AJKD <sup>12</sup>   | HD                         | BNT162b2 and mRNA-1273              | 3                                   | 205        | 95.4                         | NA                            | 62.3 <sup>b</sup>          |
| Broseta NDT <sup>13</sup>    | HD                         | mRNA-1273                           | 7                                   | 78         | 94.9                         | NA                            | NA                         |
| Chan <sup>14</sup>           | HD                         | mRNA-1273                           | 1                                   | 41         | 92.7                         | NA                            | NA                         |
| Chavarot <sup>15</sup>       | Tx                         | BNT162b2                            | 5                                   | 35*        | 5.7                          | 30.4                          | NA                         |
| Cucchiari <sup>16</sup>      | Tx                         | mRNA-1273                           | 2                                   | 117        | 29.9                         | NA                            | 54.7 <sup>a</sup>          |
| Danthu <sup>17</sup>         | HD                         | BNT162b2                            | 1                                   | 75         | 78.7                         | NA                            | NA                         |
|                              | Tx                         |                                     |                                     | 72         | 4.2                          | NA                            | NA                         |
| Dębska-Ślizień <sup>18</sup> | Tx                         | BNT162b2 and mRNA-1273              | 2-3                                 | 142        | 51.4                         | NA                            | NA                         |
| Devresse <sup>19</sup>       | Tx                         | BNT162b2                            | 4                                   | 90         | 64.4                         | NA                            | 32.2 <sup>c</sup>          |
| Ducloux <sup>20</sup>        | HD                         | BNT162b2                            | 4                                   | 50         | 90.0                         | NA                            | NA                         |
| Ducloux <sup>21</sup>        | Tx                         | BNT162b2                            | 4                                   | 153        | 79.1                         | NA                            | NA                         |
| Espi <sup>22</sup>           | HD                         | BNT162b2                            | 2                                   | 92         | 79.3                         | NA                            | 62.5 <sup>c</sup>          |
| Firket <sup>23</sup>         | Tx                         | BNT162b2                            | 2                                   | 10         | 10.0                         | NA                            | NA                         |
| Frantzen <sup>24</sup>       | HD                         | BNT162b2                            | 4                                   | 244        | 90.6                         | NA                            | NA                         |
| Garcia <sup>25</sup>         | HD                         | BNT162b2, mRNA-1273 and Ad26.COV2.S | 4-9                                 | 1468       | 92.3                         | NA                            | NA                         |
| Georgery <sup>26</sup>       | Tx                         | BNT162b2                            | 4                                   | 79         | 50.0                         | NA                            | NA                         |

|                              |    |                                        |      |      |       |      |                   |
|------------------------------|----|----------------------------------------|------|------|-------|------|-------------------|
| Giot <sup>27</sup>           | HD | BNT162b2                               | 3    | 70   | 77.1  | 52.9 | NA                |
| Grupper <sup>28</sup>        | HD | BNT162b2                               | 2    | 72   | 96.0  | NA   | NA                |
| Grupper <sup>29</sup>        | Tx | BNT162b2                               | 2    | 136  | 37.5  | NA   | NA                |
| Hall <sup>30</sup>           | Tx | mRNA-1273                              | 4-6  | 110  | 34.5  | 26.9 | 47.9 <sup>b</sup> |
| Haskin <sup>31</sup>         | Tx | BNT162b2                               | 3-8  | 38   | 63.2  | NA   | NA                |
| Hod <sup>32</sup>            | Tx | BNT162b2                               | 2-6  | 120  | 48.3  | 35.0 | NA                |
| Hsu <sup>33</sup>            | HD | BNT162b2, mRNA-1273<br>and Ad26.COVS.S | 2    | 1330 | 78.5  | NA   | NA                |
|                              | PD |                                        |      | 198  |       | NA   | NA                |
| Husain <sup>34</sup>         | Tx | BNT162b2 and mRNA-1273                 | 2-6  | 25   | 20.0  | NA   | NA                |
| Jahn <sup>35</sup>           | HD | BNT162b2                               | 2    | 72   | 93.1  | NA   | NA                |
| Kaiser <sup>36</sup>         | HD | BNT162b2 and mRNA-1273                 | 3    | 116  | 97.4  | NA   | NA                |
| Kolb <sup>37</sup>           | HD | BNT162b2                               | 2    | 31   | 87.5  | 62.5 | NA                |
|                              | PD |                                        |      | 1    |       |      | NA                |
|                              | Tx | BNT162b2 and mRNA-1273                 |      | 28   | 35.7  | 21.4 | NA                |
| Korth <sup>38</sup>          | Tx | BNT162b2                               | 2    | 23   | 21.7  | NA   | NA                |
| Labriola <sup>39</sup>       | HD | BNT162b3                               | 1    | 24   | 79.2  | NA   | NA                |
| Lacson <sup>40</sup>         | HD | BNT162b2 and mRNA-1273                 | 2-4  | 181  | 89.0  | NA   | NA                |
|                              | PD |                                        |      | 5    | 80.0  | NA   | NA                |
| Longlune <sup>41</sup>       | HD | BNT162b2                               | 4    | 82   | 84.1  | NA   | NA                |
|                              | PD |                                        |      | 20   | 85.0  | NA   | NA                |
| Marinaki <sup>42</sup>       | Tx | BNT162b2                               | 1-2  | 10   | 20.0  | NA   | NA                |
| Marion <sup>43</sup>         | Tx | BNT162b2 and mRNA-1273                 | 4    | 271  | 33.0  | NA   | NA                |
| Martín-García <sup>44</sup>  | HD | mRNA-1273                              | 8    | 30   | 100.0 | NA   | NA                |
|                              | PD |                                        |      | 12   | 100.0 | NA   | NA                |
|                              | Tx |                                        |      | 73   | 53.0  | NA   | NA                |
| Masset <sup>45</sup>         | Tx | BNT162b2                               | 4    | 456  | 49.8  | NA   | NA                |
| Melin <sup>46</sup>          | HD | BNT162b2                               | 7-15 | 50   | 84.0  | NA   | 58.0 <sup>a</sup> |
| Midtvedt <sup>47</sup>       | Tx | BNT162b2                               | 4    | 141  | 17.7  | NA   | NA                |
| Mulhern <sup>48</sup>        | HD | BNT162b2, mRNA-1273<br>and Ad26.COVS.S | 2-4  | 64   | 59.4  | NA   | NA                |
| Ou <sup>49</sup>             | Tx | BNT162b2 and mRNA-1273                 | 4    | 609  | 31.4  | NA   | NA                |
| Paal <sup>50</sup>           | HD | BNT162b2 and mRNA-1273                 | 3-6  | 249  | 96.6  | NA   | NA                |
| Pedersen <sup>51</sup>       | Tx | BNT162b2                               | 4    | 58   | 48.3  | 31.0 | NA                |
| Predecki <sup>52</sup>       | Tx | AZD1222 and BNT162b2                   | 4    | 768  | 55.3  | NA   | NA                |
| Rahav <sup>53</sup>          | Tx | BNT162b2                               | 2-4  | 110  | 45.5  | NA   | NA                |
| Rincon-Arevalo <sup>54</sup> | HD | BNT162b2                               | 1    | 40   | 70.5  | 68.2 | NA                |
|                              | PD |                                        |      | 4    |       |      | NA                |
|                              | Tx |                                        |      | 40   | 2.5   | 0.0  | NA                |

|                                  |    |                        |     |      |      |      |                    |
|----------------------------------|----|------------------------|-----|------|------|------|--------------------|
| Robert <sup>55</sup>             | HD | BNT162b2               | 4   | 53   | 84.9 | NA   | NA                 |
| Rodriguez-Espinosa <sup>56</sup> | PD | mRNA-1273              | 3   | 32   | 96.9 | NA   | NA                 |
| Rozen-Zvi <sup>57</sup>          | Tx | BNT162b2               | 2-4 | 308  | 36.4 | NA   | NA                 |
| Russo <sup>58</sup>              | Tx | BNT162b2               | 3-9 | 82   | 52.4 | NA   | NA                 |
| Santos-Araújo <sup>59</sup>      | HD | BNT162b2               | 6   | 262  | 93.1 | NA   | NA                 |
| Sattler <sup>60</sup>            | HD | BNT162b2               | 1   | 26   | 84.6 | 76.9 | 100.0 <sup>b</sup> |
|                                  | Tx |                        |     | 39   | 10.3 | 0.0  | 92.0 <sup>b</sup>  |
| Schrezenmeier <sup>61</sup>      | HD | BNT162b2               | 3-4 | 34   | 88.9 | 77.8 | 67.7 <sup>c</sup>  |
|                                  | PD |                        |     | 2    |      |      |                    |
| Simon <sup>62</sup>              | HD | BNT162b2               | 3   | 81   | 72.8 | NA   | NA                 |
| Speer Front Med <sup>63</sup>    | HD | BNT162b2               | 3   | 30   | 80.0 | 80.0 | NA                 |
| Speer Vacc <sup>64</sup>         | HD | BNT162b2               | 12  | 124  | 86.0 | NA   | NA                 |
|                                  | PD |                        |     | 41   | 92.0 | NA   | NA                 |
| Strengert <sup>65</sup>          | HD | BNT162b2               | 3   | 81   | 95.1 | NA   | 71.6 <sup>c</sup>  |
| Stumpf <sup>66</sup>             | HD | BNT162b2 and mRNA-1273 | 4-5 | 1136 | 94.5 | 94.7 | 78.2 <sup>b</sup>  |
|                                  | Tx |                        |     | 333  | 33.6 | 65.8 | 29.8 <sup>b</sup>  |
| Thieme <sup>67</sup>             | HD | BNT162b2               | 2   | 34   | 79.0 | 56.0 | 79.0 <sup>b</sup>  |
| Tylicki <sup>68</sup>            | HD | BNT162b2               | 2-3 | 91   | 95.6 | NA   | NA                 |
| Van Praet <sup>69</sup>          | HD | BNT162b2 and mRNA-1273 | 4-5 | 543  | 81.6 | NA   | 75.7 <sup>c</sup>  |
| Wijtvliet <sup>70</sup>          | HD | BNT162b2 and mRNA-1273 | 3-4 | 138  | 92.8 | NA   | NA                 |
|                                  | PD |                        |     |      |      | NA   | NA                 |
|                                  | Tx |                        |     | 133  | 62.4 | NA   | NA                 |
| Yau <sup>71</sup>                | HD | BNT162b2               | 2   | 72   | 95.8 | NA   | NA                 |
| Zitt <sup>72</sup>               | HD | BNT162b3               | 4   | 47   | 97.9 | NA   | NA                 |

The table summarizes the studies on COVID-19 vaccine specific immunity in patients with kidney failure. Only patients with a complete vaccination course and no known history of SARS-CoV-2 infection were considered for this summary. <sup>a</sup>Antiviral T cell immune response measured by IFN- $\gamma$ -ELISpot. <sup>b</sup>Antiviral CD4<sup>+</sup> T cell immune response as measured by flow cytometry <sup>c</sup>Antiviral T cell immune response measured by IFN- $\gamma$  release assay \*All patients in this cohort were treated with belatacept. HD, haemodialysis; NA, not available; PD, peritoneal dialysis; Tx, transplantation.

## References

1. Agur, T. *et al.* Antibody response to mRNA SARS-CoV-2 vaccine among dialysis patients—a prospective cohort study. *Nephrol. Dial. Transplant.* **36**, 1347–1349 (2021).
2. Anand, S. *et al.* Antibody response to COVID-19 vaccination in patients receiving dialysis. *J. Am. Soc. Nephrol.* **32**, 2435–2438 (2021).
3. Attias, P. *et al.* Antibody response to the BNT162b2 vaccine in maintenance hemodialysis patients. *Kidney Int.* **99**, 1490–1492 (2021).
4. Bachelet, T. *et al.* Humoral response after SARS-CoV-2 mRNA vaccines in dialysis patients: Integrating anti-SARS-CoV-2 Spike-Protein-RBD antibody monitoring to manage dialysis centers in pandemic times. *PLoS One* **16**, 1–11 (2021).
5. Bassi, J. *et al.* Defective neutralizing antibody response to SARS-CoV-2 in vaccinated dialysis patients. *medRxiv* 1- (2021) doi:<https://doi.org/10.1101/2021.10.05.21264054>.
6. Benotmane, I. *et al.* Low immunization rates among kidney transplant recipients who received 2 doses of the mRNA-1273 SARS-CoV-2 vaccine. *Kidney Int.* **99**, 1498–1500 (2021).
7. Berar Yanay, N. *et al.* Experience with SARS-CoV-2 BNT162b2 mRNA vaccine in dialysis patients. *Kidney Int.* **99**, 1496–1498 (2021).
8. Bertrand, D. *et al.* Antibody and T cell response to SARS-CoV-2 messenger RNA BNT162b2 vaccine in kidney transplant recipients and hemodialysis patients. *J. Am. Soc. Nephrol.* **32**, 2147–2152 (2021).
9. Bertrand, D. *et al.* Antibody response to SARS-CoV-2 mRNA BNT162b2 vaccine in kidney transplant recipients and in-centre and satellite centre haemodialysis patients. *Clin. Kidney J.* **14**, 2127–2128 (2021).
10. Billany, R. E. *et al.* Seroprevalence of antibody to S1 spike protein following vaccination against COVID-19 in patients receiving hemodialysis: a call to arms. *Kidney Int.* **99**, 1492–1494 (2021).
11. Boyarsky, B. J. *et al.* Antibody response to 2-dose SARS-CoV-2 mRNA vaccine series in solid organ transplant recipients. *JAMA - J. Am. Med. Assoc.* **325**, 2204–2206 (2021).
12. Broseta, J. J. *et al.* Humoral and Cellular Responses to mRNA-1273 and BNT162b2 SARS-CoV-

- 2 Vaccines Administered to Hemodialysis Patients. *Am. J. Kidney Dis.* **78**, 571–581 (2021).
13. Broseta, J. J., Rodríguez-Espinosa, D., Soruco, E. & Maduell, F. Weekly seroconversion rate of the mRNA-1273 SARS-CoV-2 vaccine in haemodialysis patients. *Nephrol Dial Transpl.* **36**, 1754–1755 (2021).
  14. Chan, L. *et al.* Antibody response to mRNA-1273 SARS-COV-2 vaccine in hemodialysis patients with and without prior COVID-19. *Clin. J. Am. Soc. Nephrol.* **16**, 1258–1260 (2021).
  15. Chavarot, N. *et al.* Poor Anti-SARS-CoV-2 Humoral and T-cell Responses after 2 Injections of mRNA Vaccine in Kidney Transplant Recipients Treated with Belatacept. *Transplantation* **105**, E94–E95 (2021).
  16. Cucchiari, D. *et al.* Cellular and humoral response after MRNA-1273 SARS-CoV-2 vaccine in kidney transplant recipients. *Am. J. Transplant.* **21**, 2727–2739 (2021).
  17. Danthu, C. *et al.* Humoral Response after SARS-CoV-2 mRNA Vaccination in a Cohort of Hemodialysis Patients and Kidney Transplant Recipients. *J. Am. Soc. Nephrol.* **32**, 2153–2158 (2021).
  18. Dębska-Ślizień, A. *et al.* Predictors of Humoral Response to mRNA COVID19 Vaccines in Kidney Transplant Recipients: A Longitudinal Study—The COViNEPH Project. *Vaccines* **9**, 1165 (2021).
  19. Devresse, A. *et al.* T-cell and Antibody Response after 2 Doses of the BNT162b2 Vaccine in a Belgian Cohort of Kidney Transplant Recipients. *Transplantation* **105**, E142–E143 (2021).
  20. Ducloux, D., Colladant, M., Chabannes, M., Yannaraki, M. & Courivaud, C. Humoral response after BNT162b2 mRNA COVID-19 vaccination in patients on haemodialysis depends on immune status. *Clin. Kidney J.* **14**, 2266–2267 (2021).
  21. Ducloux, D., Colladant, M., Chabannes, M., Bamoulid, J. & Courivaud, C. Factors associated with humoral response after BNT162b2 mRNA COVID-19 vaccination in kidney transplant patients. *Clin. Kidney J.* **14**, 2270–2272 (2021).
  22. Espi, M. *et al.* The ROMANOV study found impaired humoral and cellular immune responses to SARS-CoV-2 mRNA vaccine in virus-unexposed patients receiving maintenance hemodialysis. *Kidney Int.* **100**, 928–936 (2021).

23. Firket, L. *et al.* Serological response to mRNA SARS-CoV-2 BNT162b2 vaccine in kidney transplant recipients depends on prior exposure to SARS-CoV-2. *Am. J. Transplant.* (2021) doi:10.1111/ajt.16726.
24. Frantzen, L., Cavaillé, G., Thibeaut, S. & El-Haik, Y. Efficacy of the BNT162b2 mRNA COVID-19 vaccine in a haemodialysis cohort. *Nephrol. Dial. Transplant* **36**, 1756–1757 (2021).
25. Garcia, P. *et al.* COVID19 Vaccine Type and Humoral Immune Response in Patients Receiving Dialysis. *J. Am. Soc. Nephrol.* ASN.2021070936 (2021) doi:10.1681/asn.2021070936.
26. Georgery, H. *et al.* Disappointing Immunization Rate After 2 Doses of the BNT162b2 Vaccine in a Belgian Cohort of Kidney Transplant Recipients. *Transplantation Publish Ah*, (2021).
27. Giot, M. *et al.* Spike and neutralizing antibodies response to COVID-19 vaccination in haemodialysis patients. *Clin. Kidney J.* **14**, 2239–2245 (2021).
28. Grupper, A. *et al.* Humoral response to the Pfizer BNT162b2 vaccine in patients undergoing maintenance hemodialysis. *Clin. J. Am. Soc. Nephrol.* **16**, 1037–1042 (2021).
29. Grupper, A. *et al.* Reduced humoral response to mRNA SARS-CoV-2 BNT162b2 vaccine in kidney transplant recipients without prior exposure to the virus. *Am. J. Transplant.* **21**, 2719–2726 (2021).
30. Hall, V. G. *et al.* Humoral and cellular immune response and safety of two-dose SARS-CoV-2 mRNA-1273 vaccine in solid organ transplant recipients. *Am. J. Transplant.* (2021) doi:10.1111/ajt.16766.
31. Haskin, O. *et al.* Serological Response to the BNT162b2 COVID-19 mRNA Vaccine in Adolescent and Young Adult Kidney Transplant Recipients. *Transplantation* **105**, e226–e233 (2021).
32. Hod, T. *et al.* Humoral Response of Renal Transplant Recipients to the BNT162b2 SARS-CoV-2 mRNA Vaccine Using Both RBD IgG and Neutralizing Antibodies. *Transplantation Publish Ah*, 234–243 (2021).
33. Hsu, C. M. *et al.* Seroresponse to SARS-CoV-2 Vaccines Among Maintenance Dialysis Patients Caroline. *Am. J. Kidney Dis.* (2021) doi:10.1053/j.ajkd.2021.10.002.
34. Husain, S. A. *et al.* Postvaccine Anti–SARS-CoV-2 Spike Protein Antibody Development in

Kidney Transplant Recipients. *Kidney Int. Reports* **6**, 1699–1700 (2021).

35. Jahn, M. *et al.* Humoral Response to SARS-CoV-2-Vaccination with BNT162b2 (Pfizer-BioNTech) in Patients on Hemodialysis. **2**, 1–8 (2021).
36. Kaiser, R. A., Haller, M. C., Apfalter, P., Kerschner, H. & Cejka, D. Comparison of BNT162b2 (Pfizer–BioNtech) and mRNA-1273 (Moderna) SARS-CoV-2 mRNA vaccine immunogenicity in dialysis patients. *Kidney Int.* **100**, 697–698 (2021).
37. Kolb, T. *et al.* Impaired Immune Response to SARS-CoV-2 Vaccination in Dialysis Patients and in Kidney Transplant Recipients. *Kidney360* **2**, 1491–1498 (2021).
38. Korth, J. *et al.* Impaired humoral response in renal transplant recipients to SARS-CoV-2 vaccination with BNT162b2 (Pfizer-BioNTech). *Viruses* **13**, 4–9 (2021).
39. Labriola, L. *et al.* Immunogenicity of BNT162b2 SARS-CoV-2 Vaccine in a Multicenter Cohort of Nursing Home Residents Receiving Maintenance Hemodialysis. *Am. J. Kidney Dis.* **78**, 766–768 (2021).
40. Lacson, E. *et al.* Immunogenicity of SARS-CoV-2 Vaccine in Dialysis. *J. Am. Soc. Nephrol.* **32**, 2735–2742 (2021).
41. Longlune, N. *et al.* High immunogenicity of a messenger RNA-based vaccine against SARS-CoV-2 in chronic dialysis patients. *Nephrol. Dial. Transplant* **36**, 1704–1709 (2021).
42. Marinaki, S. *et al.* Immunogenicity of SARS-CoV-2 BNT162b2 vaccine in solid organ transplant recipients. *Am. J. Transplant.* **21**, 2913–2915 (2021).
43. Marion, O. *et al.* Safety and Immunogenicity of Anti-SARS-CoV-2 Messenger RNA Vaccines in Recipients of Solid Organ Transplants. *Ann. Intern. Med.* **174**, 1336–1338 (2021).
44. Martín-García, J. *et al.* Suboptimal humoral immunological response to the 2nd dose of anti-COVID19 mRNA-1273 vaccine (Moderna) in kidney transplant patients. *Nefrologia* (2021) doi:<https://doi.org/10.1016/j.nefro.2021.07.012>.
45. Masset, C. *et al.* A third injection of the BNT162b2 mRNA COVID-19 vaccine in kidney transplant recipients improves the humoral immune response. *Kidney Int.* **100**, 1132–1135 (2021).



46. Melin, J., Svensson, M. K., Albinsson, B., Winqvist, O. & Pauksens, K. Humoral and cellular response to SARS-CoV-2 BNT162b2 mRNA vaccine in hemodialysis patients. *BMC Immunol.* **22**, 1–7 (2021).
47. Midtvedt, K. *et al.* Low Immunization Rate in Kidney Transplant Recipients Also after Dose 2 of the BNT162b2 Vaccine: Continue to Keep Your Guard up! *Transplantation* **105**, E80–E81 (2021).
48. Mulhern, J. G. *et al.* Humoral Response to mRNA versus an Adenovirus Vector-Based SARS-CoV-2 Vaccine in Dialysis Patients. *Clin. J. Am. Soc. Nephrol.* CJN.06450521 (2021) doi:10.2215/cjn.06450521.
49. Ou, M. T. *et al.* Immunogenicity and Reactogenicity after SARS-CoV-2 mRNA Vaccination in Kidney Transplant Recipients Taking Belatacept. *Transplantation* **105**, 2119–2123 (2021).
50. Paal, M. *et al.* Antibody response to mRNA SARS-CoV-2 vaccines in haemodialysis patients. *Clin. Kidney J.* **14**, 2234–2238 (2021).
51. Pedersen, R. M. *et al.* The SARS-CoV-2– neutralizing capacity of kidney transplant recipients 4 weeks after receiving a second dose of the BNT162b2 vaccine. *Kidney Int.* **100**, 1129–1131 (2021).
52. Predecki, M. *et al.* Comparison of humoral and cellular responses in kidney transplant recipients receiving BNT162b2 and ChAdOx1 SARS-CoV-2 vaccines. *medRxiv* (2021).
53. Rahav, G. *et al.* BNT162b2 mRNA COVID-19 vaccination in immunocompromised patients: A prospective cohort study. *EClinicalMedicine* **41**, 101158 (2021).
54. Rincon-Arevalo, H. *et al.* Impaired humoral immunity to SARS-CoV-2 BNT162b2 vaccine in kidney transplant recipients and dialysis patients. *Sci. Immunol.* **6**, 1–13 (2021).
55. Robert, T. *et al.* Humoral response after SARS-COV2 vaccination in patient undergoing maintenance hemodialysis: loss of immunity, third dose and non-responders. *Nephrol Dial Transpl.* gfab299 (2021) doi:10.1093/ndt/gfab299.
56. Rodríguez-Espinosa, D., Broseta, J. J., Maduell, F., Bedini, J. L. & Vera, M. Humoral response of the mRNA-1273 SARS-CoV-2 vaccine in peritoneal dialysis patients. *Kidney Int.* **100**, 476–477 (2021).

57. Rozen-Zvi, B. *et al.* Antibody response to SARS-CoV-2 mRNA vaccine among kidney transplant recipients: a prospective cohort study. *Clin. Microbiol. Infect. J.* **27**, 1173.e1e1173.e4 (2021).
58. Russo, G. *et al.* SARS-COV-2 vaccination with BNT162B2 in renal transplant patients: Risk factors for impaired response and immunological implications. *Clin. Transplant.* 1–7 (2021) doi:10.1111/ctr.14495.
59. Santos-Araújo, C. *et al.* Time-dependent evolution of IgG antibody levels after first and second dose of mRNA-based SARS-CoV-2 vaccination in hemodialysis patients: a multicenter study. *Nephrol Dial Transpl.* gfab193 (2021) doi:10.1093/ndt/gfab293.
60. Sattler, A. *et al.* Impaired humoral and cellular immunity after SARS-CoV-2 BNT162b2 (tozinameran) prime-boost vaccination in kidney transplant recipients. *J. Clin. Invest.* **131**, (2021).
61. Schrezenmeier, E. *et al.* Immunogenicity of COVID-19 Tozinameran Vaccination in Patients on Chronic Dialysis. *Front. Immunol.* **12**, 1–7 (2021).
62. Simon, B. *et al.* Haemodialysis patients show a highly diminished antibody response after COVID-19 mRNA vaccination compared with healthy controls. *Nephrol. Dial. Transplant* **36**, 1709–1716 (2021).
63. Speer, C. *et al.* Humoral Responses to Single-Dose BNT162b2 mRNA Vaccination in Dialysis Patients Previously Infected With SARS-CoV-2. *Front. Med.* **8**, 1–12 (2021).
64. Speer, C. *et al.* Longitudinal humoral responses after COVID-19 vaccination in peritoneal and hemodialysis patients over twelve weeks. *Vaccines* **9**, (2021).
65. Strengert, M. *et al.* Cellular and humoral immunogenicity of a SARS-CoV-2 mRNA vaccine in patients on haemodialysis. *EBioMedicine* **70**, 1–8 (2021).
66. Stumpf, J. *et al.* Humoral and cellular immunity to SARS-CoV-2 vaccination in renal transplant versus dialysis patients : A prospective , multicenter observational study using mRNA-1273 or BNT162b2 mRNA vaccine. *Lancet Reg. Heal. - Eur.* (2021) doi:10.1016/j.lanepe.2021.100178.
67. Thieme, C. J. *et al.* Impaired Humoral but Substantial Cellular Immune Response to Variants of Concern B1.1.7 and B.1.351 in Hemodialysis Patients. *JASN* 2725–2727 (2021).
68. Tylicki, L. *et al.* Humoral response to SARS-CoV-2 vaccination promises to improve the

catastrophic prognosis of hemodialysis patients as a result of COVID-19: The COViNEPH Project. *Polish Arch. Intern. Med.* **131**, 797–801 (2021).

69. Van Praet, J. *et al.* Predictors and Dynamics of the Humoral and Cellular Immune Response to SARS-CoV-2 mRNA Vaccines in Hemodialysis Patients: A Multicenter Observational Study Journal. *J Am Soc Nephrol ASN*.2021070908 (2021) doi:10.1681/ASN.2021070908.
70. Wijtvliet, V. P. W. M. *et al.* mRNA-1273 vaccine (Moderna): a better option than BNT162b2 (Pfizer) in kidney transplant recipients and dialysis patients? *medRxiv* 2021.09.15.21263320 (2021).
71. Yau, K. *et al.* Evaluation of the SARS-CoV-2 Antibody Response to the BNT162b2 Vaccine in Patients Undergoing Hemodialysis. *JAMA Netw. Open* **4**, 1–10 (2021).
72. Zitt, E. *et al.* The Safety and Immunogenicity of the mRNA-BNT162b2 SARS-CoV-2 Vaccine in Hemodialysis Patients. *Front. Immunol.* **12**, 1–9 (2021).
